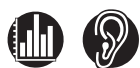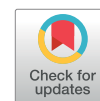

# Longitudinal Changes in Arterial Stiffness and Heart Rate Variability in Youth-Onset Type 1 Versus Type 2 Diabetes: The SEARCH for Diabetes in Youth Study

*Diabetes Care* 2022;45:1647–1656 | <https://doi.org/10.2337/dc21-2426>

Amy S. Shah,<sup>1</sup> Scott Isom,<sup>2</sup>  
Ralph D'Agostino Jr.,<sup>2</sup>  
Lawrence M. Dolan,<sup>1</sup> Dana Dabelea,<sup>3</sup>  
Giuseppina Imperatore,<sup>4</sup> Amy Mottl,<sup>5</sup>  
Eva Lustigova,<sup>6</sup> Catherine Pihoker,<sup>7</sup>  
Santica Marcovina,<sup>8</sup> and  
Elaine M. Urbina<sup>1</sup>

## OBJECTIVE

We compared arterial stiffness and heart rate variability (HRV) over time by diabetes type and determined the risk factors associated with worsening arterial stiffness and HRV in young adults with youth-onset diabetes.

## RESEARCH DESIGN AND METHODS

Arterial stiffness (pulse wave velocity, augmentation index) and six indices of heart rate variability were measured twice, 4.5 years apart, among participants with either youth-onset type 1 or type 2 diabetes in the SEARCH for Diabetes in Youth study. Multivariable linear regression models were used to assess risk factors associated with arterial stiffness and HRV at follow-up.

## RESULTS

Of 1,159 participants studied, 949 had type 1 diabetes (mean age  $17.1 \pm 4.7$  years, 60.3% non-Hispanic White, 55% female) and 210 had type 2 diabetes (mean age  $22.1 \pm 3.5$  years, 23.8% non-Hispanic White, 71% female) at initial assessment when diabetes duration was 7.9 years (both groups). Participants with type 2 versus type 1 diabetes had greater arterial stiffness and more abnormalities in HRV at initial and follow-up assessment and a greater change over time (all  $P < 0.05$ ). Risk factors associated with worse arterial stiffness and HRV at follow-up in both types of diabetes included higher blood pressure, hemoglobin A<sub>1c</sub>, waist circumference, and triglycerides over time and longer diabetes duration.

## CONCLUSIONS

Arterial stiffness and HRV worsened over time with greater changes among participants with type 2 versus type 1 diabetes and among those with features of the metabolic syndrome. The risk factor profile documents potentially modifiable pathways to prevent or limit cardiovascular complications in young adults with youth-onset diabetes.

Risk factors for cardiovascular disease, including hypertension, dyslipidemia, and microalbuminuria, are observed in patients with childhood-onset type 1 and type 2

<sup>1</sup>Department of Pediatrics, Cincinnati Children's Hospital Medical Center and The University of Cincinnati, Cincinnati, OH

<sup>2</sup>Department of Biostatistics and Data Science, Wake Forest School of Medicine, Winston-Salem, NC

<sup>3</sup>Lifecourse Epidemiology of Adiposity and Diabetes Center, University of Colorado Anschutz Medical Campus, Aurora, CO

<sup>4</sup>Division of Diabetes Translation, Centers for Disease Control and Prevention, Atlanta, GA

<sup>5</sup>Division of Nephrology and Hypertension, University of North Carolina School of Medicine, Chapel Hill, NC

<sup>6</sup>Department of Research and Evaluation, Kaiser Permanente Southern California, Pasadena, CA

<sup>7</sup>Department of Pediatrics, University of Washington, Seattle, WA

<sup>8</sup>Department of Medicine, University of Washington, Seattle, WA

Corresponding author: Amy S. Shah, amy.shah@cchmc.org

Received 21 November 2021 and accepted 2 March 2022

This article contains supplementary material online at <https://doi.org/10.2337/figshare.19299005>.

This article is featured in a podcast available at [diabetesjournals.org/journals/pages/diabetes-core-update-podcasts](https://diabetesjournals.org/journals/pages/diabetes-core-update-podcasts).

© 2022 by the American Diabetes Association. Readers may use this article as long as the work is properly cited, the use is educational and not for profit, and the work is not altered. More information is available at <https://www.diabetesjournals.org/journals/pages/license>.

diabetes. Data show a higher prevalence in the number and severity of cardiovascular risk factors in youth with type 2 versus type 1 diabetes (1). Higher arterial stiffness and lower heart rate variability (HRV) have also been documented in young adults with type 2 versus type 1 diabetes (1–5).

In adults, arterial stiffness is an early marker of cardiovascular disease and predicts greater cardiovascular morbidity and mortality (6,7). Abnormalities in HRV represent cardiac autonomic dysfunction and are associated with myocardial infarction and sudden death (8–12). Furthermore, alterations in HRV have been associated with increased arterial stiffness in individuals with diabetes (13,14).

Despite the wealth of cross-sectional reports documenting cardiovascular risk factors and arterial stiffness and HRV data in individuals with youth-onset type 1 and type 2 diabetes reported by us and others (15–20), limited data on changes in arterial stiffness and HRV over time exist. Additionally, no previous studies have compared participants with type 1 and type 2 diabetes at follow-up and whether the change in arterial stiffness and HRV over time differs by diabetes type.

We examined changes in arterial stiffness and HRV in participants with youth-onset type 1 and type 2 diabetes enrolled in the observational SEARCH for Diabetes in Youth (SEARCH) study. The objectives of the study were to 1) compare arterial stiffness and HRV at initial and follow-up assessment by diabetes type, 2) compare the change over time by diabetes type, and 3) determine the relationship between burden of risk factors associated with worse arterial stiffness and HRV at follow-up assessment.

## RESEARCH DESIGN AND METHODS

### Description of the Study Participants

SEARCH is a longitudinal study of individuals with youth-onset (diagnosed at <20 years of age) type 1 or type 2 diabetes. Participants in the SEARCH cohort study were recruited from the population-based SEARCH registry study of individuals with youth-onset type 1 and type 2 diabetes from Colorado, including southwestern American Indian reservations; Ohio; Washington; South Carolina; and California continuously since 2002. Individuals in the current analysis were part of the SEARCH cohort study and diag-

nosed with type 1 or type 2 diabetes in 2002–2006 or 2008 and participated in a baseline visit shortly after diabetes diagnosis. Arterial stiffness and HRV were measured once initially between 2011 and 2015 and then repeated in 2015–2019. These data focus on the initial and follow-up arterial stiffness ( $n = 1,159$  total,  $n = 949$  with type 1 diabetes, and  $n = 210$  with type 2 diabetes) and HRV ( $n = 1,056$  total,  $n = 864$  with type 1 diabetes, and  $n = 192$  with type 2 diabetes) measurements.

Diabetes type was defined based on measures at the baseline visit, termed etiologic diabetes type (21). Individuals with clinically diagnosed diabetes who were insulin sensitive (22) or antibody positive were characterized as having type 1 diabetes ( $n = 812$ ), and those who were insulin resistant (22) and islet cell antibody negative were characterized as having type 2 diabetes ( $n = 187$ ). In 197 participants, either islet cell antibodies or insulin sensitivity measures were unavailable; for these participants, diabetes type was based on their provider diagnosis (162 with type 1, 35 with type 2 diabetes). Previous work in SEARCH has shown good agreement between etiologic diabetes type and provider-diagnosed diabetes type (23), and here, we found no differences in age, race, sex, or hemoglobin A<sub>1c</sub> (HbA<sub>1c</sub>) by the two methods of determination. All participants or parent/guardians provided written informed consent and assent, as appropriate for age. Institutional review board approval was obtained at each site.

### Data Collection

The same methods were used to measure anthropometric, demographic, and metabolic variables at both visits. Sex, race and ethnicity, medical and social history, and current medications were self-reported. Height and weight were measured and BMI calculated as kilograms per meters squared. Waist circumference was measured twice in centimeters using the natural waist defined as midway between the lowest rib margin and the right iliac crest at the midaxillary line. A third measurement was made if the second measure differed from the first by >1.0 cm. Blood was collected after a minimum 8-h fast, and all samples were analyzed at the Northwest Lipid Meta-

bolism and Diabetes Research Laboratories at the University of Washington (17). Resting systolic blood pressure (BP) and diastolic BP were measured three times, using an aneroid sphygmomanometer and an appropriate-sized cuff, after the participants were seated for at least 5 min, according to published guidelines (25). Mean arterial pressure (MAP) was calculated as  $[(2 \times \text{diastolic BP}) + \text{systolic BP}] / 3$ .

Arterial stiffness and HRV were measured using the SphygmoCor Vx device (ATCOR, Sydney, Australia) following the same protocol used at the initial (2011–2015) and follow-up (2015–2019) assessments (1). All measurements occurred in the morning in a room with a stable temperature and the participant lying in the resting supine position for 10 min. Arterial stiffness outcomes included 1) carotid-femoral pulse wave velocity (PWV) (primary outcome), 2) carotid-radial PWV, 3) femoral-foot PWV, and 4) augmentation index (Alx). PWV is the speed of pressure waves generated by cardiac ejection to reach the periphery. A pressure waveform obtained from the proximal site (carotid artery) is recorded followed by a second arterial waveform recorded from the distal site (femoral, foot, or radial artery) using a tonometer. Waveforms are also recorded on a simultaneous electrocardiogram. PWV is the difference between the two sites, measured to the nearest 0.1 cm, divided by the time delay measured between the feet of the two waveforms, and reported in meters per second. The average of >10 beats was used in the analysis to cover a complete respiratory cycle. Three PWV recordings were obtained per participant at each site and averaged. Repeat measures show a coefficient of variation of <7% (26).

Alx is a measure of wave reflections and systemic arterial stiffness (27). The SphygmoCor tonometer was placed over the right radial artery, and pressure waves were recorded. The device analyzes pulse waves using a generalized transfer function validated in the catheterization laboratory to calculate a central aortic pressure wave (28). The Alx is derived from the central pressure waveform by calculating the difference between the main outgoing wave and the reflected wave and expressed as a percentage of the central pulse pressure. The magnitude of reflected wave represents the increased

**Table 1—Characteristics of participants with arterial stiffness data**

| Characteristic                      | All<br>(N = 1,159) | Type 1 diabetes<br>(n = 949) | Type 2 diabetes<br>(n = 210) | P       |
|-------------------------------------|--------------------|------------------------------|------------------------------|---------|
| <b>Data at initial assessment</b>   |                    |                              |                              |         |
| Age (years)                         | 18.0 (4.9)         | 17.1 (4.7)                   | 22.1 (3.5)                   | <0.0001 |
| Duration of diabetes (years)        | 7.9 (1.9)          | 7.9 (1.9)                    | 7.9 (2.0)                    | 0.8654  |
| Race                                |                    |                              |                              | <0.0001 |
| Non-Hispanic White                  | 622 (53.7)         | 572 (60.3)                   | 50 (23.8)                    |         |
| Non-Hispanic Black                  | 219 (18.9)         | 125 (13.2)                   | 94 (44.8)                    |         |
| Hispanic                            | 224 (19.3)         | 181 (19.1)                   | 43 (20.5)                    |         |
| Other race group*                   | 94 (8.1)           | 71 (7.5)                     | 23 (11.0)                    |         |
| Sex                                 |                    |                              |                              | <0.0001 |
| Female                              | 667 (57.5)         | 518 (54.6)                   | 149 (71.0)                   |         |
| Male                                | 492 (42.5)         | 431 (45.4)                   | 61 (29.0)                    |         |
| BMI (kg/m <sup>2</sup> )            | 25.8 (7.7)         | 23.6 (5.3)                   | 35.9 (8.6)                   | <0.0001 |
| Waist circumference (cm)            | 88.3 (19.8)        | 82.5 (14.8)                  | 114.6 (18.3)                 | <0.0001 |
| Systolic BP (mmHg)                  | 108.0 (12.5)       | 105.7 (11.1)                 | 118.6 (13.4)                 | <0.0001 |
| Diastolic BP (mmHg)                 | 69.8 (9.7)         | 68.4 (9.0)                   | 76.1 (10.1)                  | <0.0001 |
| HbA <sub>1c</sub> (%)               | 9.2 (2.2)          | 9.2 (1.9)                    | 9.3 (3.0)                    | 0.5072  |
| LDL-C (mg/dL)                       | 98.1 (30.3)        | 96.0 (27.4)                  | 107.6 (39.3)                 | <0.0001 |
| HDL-C (mg/dL)                       | 52.9 (14.6)        | 55.6 (14.0)                  | 41.4 (11.2)                  | <0.0001 |
| Triglycerides (mg/dL)               | 79.0 (56.0; 115.0) | 72.0 (53.0; 102.0)           | 121.0 (85.0; 201.0)          | <0.0001 |
| Antihypertension medications        |                    |                              |                              | <0.0001 |
| ACE inhibitors or ARBs              | 80 (6.9)           | 47 (5.0)                     | 33 (15.8)                    |         |
| Other hypertension                  | 28 (2.4)           | 11 (1.2)                     | 17 (8.1)                     |         |
| Lipid-lowering medications          |                    |                              |                              | 0.0008  |
| Statins                             | 33 (2.9)           | 21 (2.2)                     | 12 (5.7)                     |         |
| Fibrates                            | 2 (0.2)            | 1 (0.1)                      | 1 (0.5)                      |         |
| Other                               | 16 (1.4)           | 9 (0.9)                      | 7 (3.3)                      |         |
| <b>Data at follow-up assessment</b> |                    |                              |                              |         |
| Age (years)                         | 22.6 (4.9)         | 21.8 (4.8)                   | 26.5 (3.4)                   | <0.0001 |
| Duration of diabetes (years)        | 12.5 (2.2)         | 12.5 (2.2)                   | 12.3 (2.1)                   | 0.2780  |
| BMI (kg/m <sup>2</sup> )            | 127.6 (7.2)        | 25.8 (5.2)                   | 35.8 (9.0)                   | <0.0001 |
| Waist circumference (cm)            | 94.0 (17.9)        | 89.3 (14.0)                  | 115.3 (18.3)                 | <0.0001 |
| Systolic BP (mmHg)                  | 111.9 (13.5)       | 109.7 (11.4)                 | 122.1 (17.1)                 | <0.0001 |
| Diastolic BP (mmHg)                 | 72.7 (10.3)        | 71.1 (9.3)                   | 79.8 (11.4)                  | <0.0001 |
| HbA <sub>1c</sub> (%)               | 9.2 (2.2)          | 9.1 (2.0)                    | 9.6 (3.0)                    | 0.0021  |
| LDL-C (mg/dL)                       | 104.6 (33.0)       | 103.1 (30.8)                 | 111.1 (41.0)                 | 0.0012  |
| HDL-C (mg/dL)                       | 52.7 (14.7)        | 55.0 (14.3)                  | 42.5 (12.0)                  | <0.0001 |
| Triglycerides (mg/dL)               | 83.0 (60.0; 123.0) | 77.0 (57.0; 107.0)           | 124.0 (92.0; 204.0)          | <0.0001 |
| CRP (mg/dL)                         | 0.2 (0.1; 0.5)     | 0.1 (0.0; 0.4)               | 0.5 (0.2; 1.1)               | <0.0001 |
| Physically active                   | 430 (38.9)         | 366 (40.4)                   | 64 (32.2)                    | 0.0318  |
| Antihypertension medications        |                    |                              |                              | 0.0010  |
| ACE inhibitors or ARBs              | 98 (9.0)           | 69 (7.6)                     | 29 (15.9)                    |         |
| Other hypertension                  | 22 (2.0)           | 17 (1.9)                     | 5 (2.7)                      |         |
| Lipid-lowering medications          |                    |                              |                              | 0.0010  |
| Statins                             | 57 (5.2)           | 41 (4.5)                     | 16 (8.8)                     |         |
| Fibrates                            | 2 (0.2)            | 0 (0.0)                      | 2 (1.1)                      |         |
| Other                               | 2 (0.2)            | 2 (0.2)                      | 0 (0.0)                      |         |

Data are n (%), mean (SD), or median (25th percentile; 75th percentile). ARB, angiotensin receptor blocker; HDL-C, HDL cholesterol. \*Other race group included 2.2% American Indian/Alaskan Native, 1.0% Asian, 4.6% multiple races, and 0.4% unknown.

afterload that the left ventricle must cope with. A higher Alx indicates increased vessel stiffness and has been used to predict cardiovascular events in adults (29). Since Alx is affected by heart rate, all values were adjusted to a standard heart rate of 75 beats/min. The average of three Alx measurements was used in the analysis. Reproducibility studies in our laboratory demonstrated intraclass correlation coefficients between 0.7 and 0.9. For both

PWV and Alx, a higher value indicates greater stiffness.

Heart beats from an electrocardiogram were recorded for 10 min to determine HRV. The SphygmoCor Vx device takes into account the normal heart beats, ignoring ectopic beats, to derive the normal R-R intervals (N-N intervals) of the electrocardiogram and estimates several time-domain HRV indices. Both time- and frequency-domain HRV parameters are

derived. Time domains include 1) the SD of the N-N intervals (SDNN), 2) the root mean square differences of successive N-N intervals (RMSSD), and 3) the percentage of adjacent N-N intervals with a difference >50 ms (PNN50). Frequency domains are calculated using fast Fourier analysis, which separates the heart rate spectrum into various components, including 1) normalized high frequency (HF) power, 2) normalized low frequency (LF)

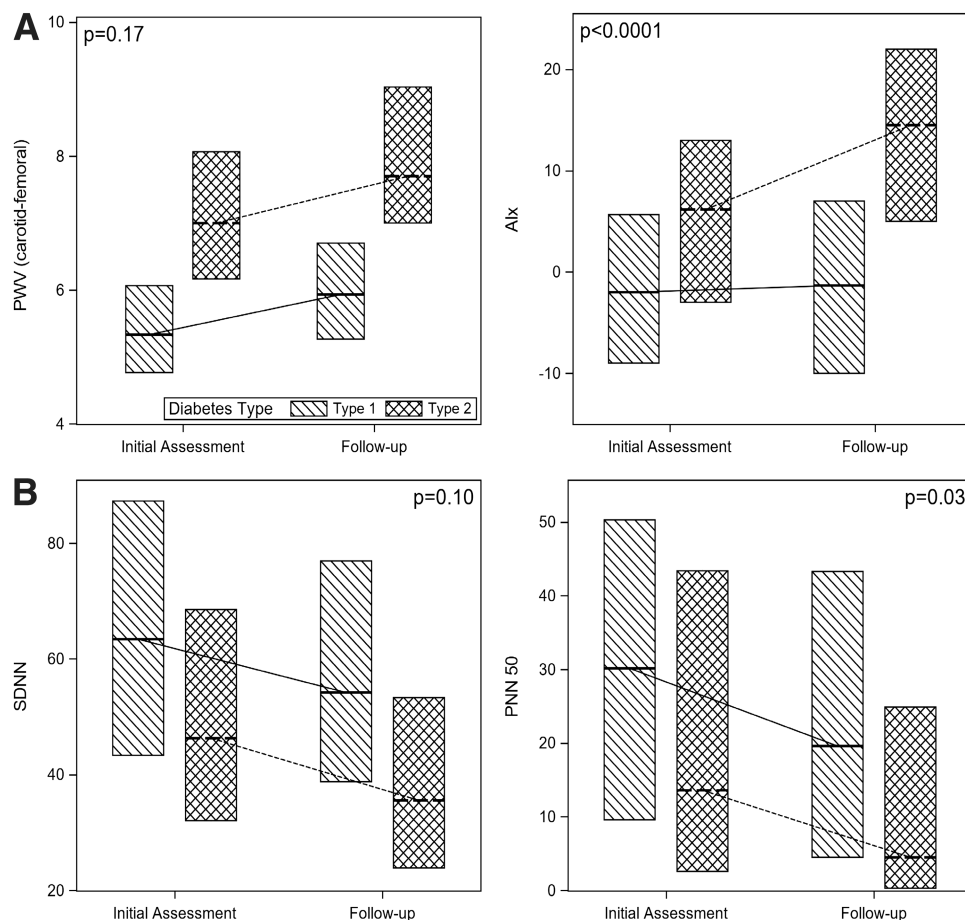

**Figure 1**—Arterial stiffness (carotid-femoral PWV and Alx) and HRV (SDNN and PNN50) at initial to follow-up assessment by diabetes type. A: Arterial stiffness measures. B: HRV measures. Data are median and interquartile range. *P* values represent the difference between the two diabetes type groups with regard to change from initial assessment to follow-up.

power, and 3) their ratio (LF:HF ratio). SDNN is a measure of overall HRV. RMSSD and PNN50 represent the parasympathetic component of the HRV; thus, parasympathetic loss is quantified by the reduction in RMSSD and HF power (30). HF and LF power have traditionally been thought to represent parasympathetic and sympathetic components of HRV, respectively (31). More recent literature has suggested that this view is overly simplistic, as LF and HF may be influenced by respiratory sinus arrhythmia, position, movement, and other vagal components (32). For all HRV measures (except LF:HF ratio), a lower value indicates worse HRV. Arterial stiffness and HRV measurements were attempted in all participants. All data were checked for clinical and statistical outliers. Of the participants studied, 140 had arterial stiffness measurements only, 37 had HRV measurements only, and 1,019 had both arterial stiffness and HRV measurements.

### Statistics

Summary statistics were calculated using means and SDs, median and interquartile ranges, or counts and percentages. Comparisons of diabetes types (type 1 vs. type 2) were done using *t* tests, Kruskal-Wallis tests, or  $\chi^2$  tests, depending on the distribution, with  $P < 0.05$  indicating a significant difference between groups.

Multivariable linear regression models were used to determine whether diabetes type was associated with the arterial stiffness or HRV at follow-up assessment. Clinical considerations were used to identify the candidate variables, and then, through backward selection, variables that did not have an association with the outcome were removed. Diabetes type and study site were forced into the model since diabetes type was the comparison of interest and study site can account for variability in many unmeasurable attributes. Models included diabetes type, age, race and ethnicity, sex, and arterial stiffness or HRV value from the first assessment;

physical activity (no: at least 10 min of exercise 0–2 days/week, yes: 3–7 days/week), healthy eating index, smoking status, use of hypertension medications, use of lipid medications, and diabetes duration at the follow-up assessment, study site; and time-weighted values for MAP, LDL cholesterol (LDL-C), HbA<sub>1c</sub>, log triglycerides, and waist circumference. Time-weighted values for BP (MAP), LDL-C, HbA<sub>1c</sub>, log triglycerides, and waist circumference were created using all available data from participants, including data that may have preceded the initial arterial stiffness and HRV measurements, to assess burden of the risk factors. C-reactive protein (CRP) from the follow-up visit was also included in all models, as CRP was not available at the initial assessment. Height was added in the model for Alx, and heart rate was added in the models for all stiffness measures.

### Data and Resource Availability

All data and materials are available upon request.

**Table 2—Arterial stiffness and HRV measurements at initial and follow-up assessment in youth with diabetes**

|                                                   | All               | Type 1            | Type 2            | P       |
|---------------------------------------------------|-------------------|-------------------|-------------------|---------|
| <b>Arterial stiffness at initial assessment</b>   |                   |                   |                   |         |
| PWV (m/s)                                         |                   |                   |                   |         |
| Carotid-femoral                                   | 5.5 (4.9; 6.4)    | 5.3 (4.8; 6.1)    | 7.0 (6.2; 8.1)    | <0.0001 |
| Femoral-foot                                      | 8.1 (7.1; 9.1)    | 8.0 (7.0; 8.9)    | 8.9 (7.8; 9.8)    | <0.0001 |
| Carotid-radial                                    | 7.4 (6.7; 8.2)    | 7.3 (6.6; 8.0)    | 8.0 (7.3; 9.3)    | <0.0001 |
| Alx (%)                                           | −0.7 (−8.0; 7.3)  | −2.0 (−9.0; 5.7)  | 6.2 (−3.0; 13.0)  | <0.0001 |
| <b>Arterial stiffness at follow-up assessment</b> |                   |                   |                   |         |
| PWV (m/s)                                         |                   |                   |                   |         |
| Carotid-femoral                                   | 6.2 (5.4; 7.2)    | 5.9 (5.3; 6.7)    | 7.7 (7.0; 9.0)    | <0.0001 |
| Femoral-foot                                      | 8.8 (7.9; 10.0)   | 8.7 (7.8; 9.8)    | 9.9 (8.6; 10.9)   | <0.0001 |
| Carotid-radial                                    | 7.9 (7.0; 9.2)    | 7.7 (6.8; 8.7)    | 9.2 (8.0; 10.8)   | <0.0001 |
| Alx (%)                                           | 1.0 (−8.7; 11.0)  | −1.3 (−10.0; 7.0) | 14.5 (5.0; 22.0)  | <0.0001 |
| <b>Change in arterial stiffness over time</b>     |                   |                   |                   |         |
| PWV                                               |                   |                   |                   |         |
| Carotid-femoral change (m/s)                      | 0.7 (1.2)         | 0.7 (1.1)         | 0.8 (1.7)         | 0.1686  |
| Femoral-foot change (mm)                          | 0.8 (1.6)         | 0.8 (1.6)         | 0.9 (1.7)         | 0.4161  |
| Carotid-radial change (mm)                        | 0.6 (1.7)         | 0.5 (1.6)         | 1.2 (2.0)         | <0.0001 |
| Alx change (%)                                    | 1.8 (11.6)        | 0.7 (11.6)        | 6.5 (10.5)        | <0.0001 |
| <b>HRV at initial assessment</b>                  |                   |                   |                   |         |
| SDNN (ms)                                         | 60.1 (41.2; 85.0) | 63.4 (43.4; 87.3) | 46.3 (32.1; 68.6) | <0.0001 |
| PNN50 (%)                                         | 28.7 (7.3; 48.9)  | 30.2 (9.6; 50.3)  | 13.6 (2.6; 43.4)  | <0.0001 |
| RMSSD (ms)                                        | 51.2 (29.8; 80.4) | 54.7 (32.2; 85.1) | 39.0 (22.9; 66.5) | <0.0001 |
| LF (n.u.)                                         | 45.0 (30.3; 59.3) | 44.1 (30.2; 58.7) | 47.9 (32.5; 61.8) | 0.0675  |
| HF (n.u.)                                         | 55.1 (40.7; 69.7) | 55.9 (41.3; 69.9) | 52.1 (38.2; 67.5) | 0.0675  |
| LF:HF ratio                                       | 0.8 (0.4; 1.5)    | 0.8 (0.4; 1.4)    | 0.9 (0.5; 1.6)    | 0.0675  |
| <b>HRV at follow-up assessment</b>                |                   |                   |                   |         |
| SDNN (ms)                                         | 51.5 (34.4; 73.0) | 54.2 (38.8; 76.9) | 35.6 (23.9; 53.3) | <0.0001 |
| PNN50 (%)                                         | 16.5 (2.6; 40.7)  | 19.6 (4.5; 43.3)  | 4.5 (0.3; 24.9)   | <0.0001 |
| RMSSD (ms)                                        | 40.4 (22.9; 67.5) | 43.3 (25.6; 70.1) | 27.5 (14.2; 47.3) | <0.0001 |
| LF (n.u.)                                         | 48.3 (35.0; 63.2) | 48.1 (34.7; 62.5) | 49.7 (36.6; 66.2) | 0.3002  |
| HF (n.u.)                                         | 51.7 (36.8; 65.0) | 51.9 (37.5; 65.3) | 50.3 (33.8; 63.4) | 0.3002  |
| LF:HF ratio                                       | 0.9 (0.5; 1.7)    | 0.9 (0.5; 1.7)    | 1.0 (0.6; 2.0)    | 0.2898  |
| <b>Change in HRV over time</b>                    |                   |                   |                   |         |
| SDNN (ms)                                         | −8.9 (27.8)       | −8.2 (28.1)       | −11.9 (26.3)      | 0.0961  |
| PNN50 (%)                                         | −6.4 (19.2)       | −5.8 (19.3)       | −9.1 (18.5)       | 0.0314  |
| RMSSD (ms)                                        | −11.3 (34.1)      | −10.8 (34.5)      | −13.5 (31.9)      | 0.3041  |
| LF (n.u.)                                         | 3.1 (21.0)        | 3.3 (21.0)        | 2.1 (20.9)        | 0.4731  |
| HF (n.u.)                                         | −3.1 (21.0)       | −3.3 (21.0)       | −2.1 (20.9)       | 0.4731  |
| LF:HF ratio                                       | 0.2 (1.9)         | 0.2 (1.9)         | 0.1 (2.1)         | 0.6648  |

Data are mean (SD) or median (25th percentile; 75th percentile). n.u., normalized units.

## RESULTS

Demographic and metabolic characteristics of the cohort (949 participants with type 1 diabetes, 210 with type 2 diabetes) who had initial and follow-up arterial stiffness assessments are presented in Table 1. At the first arterial stiffness assessment, both groups had a mean duration of diabetes of ~8 years. Individuals with type 2 diabetes were older (22 vs. 17 years) and more likely to be female (71% vs. 55%) and identify with racial or ethnic minority populations (76% vs. 40%, all  $P < 0.0001$ ). Those with type 2 diabetes had a higher mean BMI (35.9 vs. 23.6 kg/m<sup>2</sup>), BP (119/76 vs. 106/68 mmHg), and worse lipid

levels than those with type 1 diabetes (all  $P < 0.0001$ ). In addition, participants with type 2 diabetes reported more use of antihypertension (23.9% vs. 6.1%) and lipid-lowering (9.6% vs. 3.3%) medications than those with type 1 diabetes (all  $P < 0.0001$ ).

At follow-up (arterial stiffness and HRV assessment 4.6 ± 1.1 years later), participants with type 2 diabetes continued to have higher BMI and BP, worse dyslipidemia (Table 1), and greater use of antihypertension (17.7% vs. 9.5%) and lipid-lowering (9.8% vs. 4.6%) medications than those with type 1 diabetes (all  $P < 0.01$ ). CRP and HbA<sub>1c</sub> were also higher in those with type 2 diabetes

versus type 1 diabetes (9.6 vs. 9.1%,  $P = 0.0021$ ).

Not all participants had both arterial stiffness and HRV measured. There were 864 participants with type 1 diabetes and 192 with type 2 diabetes who had only HRV measured twice. Demographic and metabolic characteristics were compared between these individuals as above. While the actual means differed from those described above, the group differences and the findings did not (Supplementary Table 1).

Figure 1A and Table 2 show median values for carotid-femoral PWV and Alx at initial and follow-up assessment stratified by diabetes type. Carotid-femoral

**Table 3—Risk factors associated with arterial stiffness and HRV outcomes**

|                                                           |               | <i>P</i> |
|-----------------------------------------------------------|---------------|----------|
| <b>Carotid-femoral PWV (m/s) (higher is worse)</b>        |               |          |
| Intercept                                                 | −2.34 (0.46)  | <0.0001  |
| Etiologic type: type 1 diabetes (REF = type 2 diabetes)   | −0.22 (0.11)  | 0.0428   |
| Age (years)                                               | 0.02 (0.01)   | 0.0216   |
| Diabetes duration (years)                                 | 0.06 (0.01)   | <0.0001  |
| Time-weighted waist circumference (cm)                    | 0.02 (0)      | <0.0001  |
| Time-weighted MAP (mmHg)                                  | 0.03 (0)      | <0.0001  |
| Time-weighted HbA <sub>1c</sub> (%)                       | 0.07 (0.02)   | 0.0001   |
| Heart rate (beats/min)                                    | 0.02 (0)      | <0.0001  |
| Initial carotid-femoral PWV                               | 0.29 (0.03)   | <0.0001  |
| <b>Femoral-foot PWV (m/s) (higher is worse)</b>           |               |          |
| Intercept                                                 | 1.35 (0.71)   | 0.0573   |
| Etiologic type: type 1 diabetes (REF = type 2 diabetes)   | −0.19 (0.16)  | 0.2321   |
| Age (years)                                               | 0.05 (0.01)   | <0.0001  |
| Diabetes duration (years)                                 | 0.05 (0.02)   | 0.0092   |
| Sex: male (REF = female)                                  | 0.22 (0.08)   | 0.0089   |
| Time-weighted waist circumference (cm)                    | −0.01 (0)     | 0.0013   |
| Time-weighted MAP (mmHg)                                  | 0.04 (0.01)   | <0.0001  |
| Time-weighted HbA <sub>1c</sub> (%)                       | 0.07 (0.03)   | 0.0074   |
| Ln(time-weighted triglycerides) (mg/dL)                   | 0.27 (0.09)   | 0.0044   |
| Initial femoral-foot PWV                                  | 0.21 (0.03)   | <0.0001  |
| <b>Carotid-radial PWV (m/s) (higher is worse)</b>         |               |          |
| Intercept                                                 | 1.1 (0.61)    | 0.0740   |
| Etiologic type: type 1 diabetes (REF = type 2 diabetes)   | −0.27 (0.13)  | 0.0348   |
| Age (years)                                               | 0.04 (0.01)   | <0.0001  |
| Diabetes duration (years)                                 | 0.04 (0.02)   | 0.0497   |
| Race/ethnicity: non-Hispanic White                        | −0.38 (0.09)  | <0.0001  |
| Sex: male (REF = female)                                  | 0.28 (0.08)   | 0.0008   |
| Time-weighted MAP (mmHg)                                  | 0.03 (0.01)   | <0.0001  |
| Time-weighted HbA <sub>1c</sub> (%)                       | 0.07 (0.03)   | 0.0065   |
| Heart rate (beats/min)                                    | 0.02 (0)      | <0.0001  |
| Initial carotid-radial PWV                                | 0.26 (0.03)   | <0.0001  |
| <b>Alx (%) (higher is worse)</b>                          |               |          |
| Intercept                                                 | 4.92 (7.18)   | 0.4938   |
| Etiologic type: type 1 diabetes (REF = type 2 diabetes)   | −3.28 (1.01)  | 0.0012   |
| Age (years)                                               | 0.68 (0.09)   | <0.0001  |
| Diabetes duration (years)                                 | 0.51 (0.15)   | 0.0008   |
| Time-weighted MAP (mmHg)                                  | 0.24 (0.05)   | <0.0001  |
| Time-weighted HbA <sub>1c</sub> (%)                       | 1.22 (0.05)   | <0.0001  |
| Physically active: yes (REF = no)                         | −2.93 (0.64)  | <0.0001  |
| Height (cm)                                               | −30.75 (3.73) | <0.0001  |
| Initial Alx                                               | 0.51 (0.03)   | <0.0001  |
| <b>Ln(SDNN) (lower is worse)</b>                          |               |          |
| Intercept                                                 | 3.55 (0.29)   | <0.0001  |
| Etiologic type: type 1 diabetes (REF = type 2 diabetes)   | 0.08 (0.04)   | 0.0724   |
| Diabetes duration (years)                                 | −0.02 (0.01)  | 0.0146   |
| Sex: male (REF: female)                                   | 0.12 (0.03)   | <0.0001  |
| Time-weighted MAP (mmHg)                                  | −0.01 (0)     | 0.0006   |
| Time-weighted HbA <sub>1c</sub> (%)                       | −0.08 (0.01)  | <0.0001  |
| Ln(time-weighted triglycerides) (mg/dL)                   | −0.11 (0.03)  | 0.0005   |
| Physically active: yes (REF = no)                         | 0.09 (0.03)   | 0.0011   |
| Initial Ln(SDNN)                                          | 0.56 (0.03)   | <0.0001  |
| <b>PNN50 (lower is worse)</b>                             |               |          |
| Intercept                                                 | 72.42 (8.88)  | <0.0001  |
| Etiologic type 1: type 1 diabetes (REF = type 2 diabetes) | 1.5 (1.67)    | 0.3698   |
| Diabetes duration (years)                                 | −0.91 (0.24)  | 0.0002   |
| Time-weighted MAP (mmHg)                                  | −0.23 (0.08)  | 0.0029   |
| Time-weighted HbA <sub>1c</sub> (%)                       | −2.34 (0.34)  | <0.0001  |
| Ln(time-weighted triglycerides) (mg/dL)                   | −2.9 (1.17)   | 0.0136   |
| Physically active: yes (REF = no)                         | 4.05 (1.08)   | 0.0002   |
| Initial PNN50                                             | 0.51 (0.02)   | <0.0001  |

Continued on p. 1653



Table 3—Continued

|                                                         |              | <i>P</i> |
|---------------------------------------------------------|--------------|----------|
| Ln(RMSSD) (lower is worse)                              |              |          |
| Intercept                                               | 4.35 (0.35)  | <0.0001  |
| Etiologic type: type 1 diabetes (REF = type 2 diabetes) | 0.04 (0.06)  | 0.4452   |
| Diabetes duration (years)                               | −0.03 (0.01) | 0.0005   |
| Sex: male (REF: female)                                 | 0.11 (0.04)  | 0.0025   |
| Time-weighted MAP (mmHg)                                | −0.01 (0)    | 0.0002   |
| Time-weighted HbA <sub>1c</sub> (%)                     | −0.11 (0.01) | <0.0001  |
| Ln(time-weighted triglycerides) (mg/dL)                 | −0.16 (0.04) | <0.0001  |
| Physically active: yes (REF = no)                       | 0.11 (0.04)  | 0.0028   |
| Initial Ln(RMSSD)                                       | 0.56 (0.03)  | <0.0001  |
| Ln(LF:HF ratio) (higher is worse)                       |              |          |
| Intercept                                               | −1.09 (0.22) | <0.0001  |
| Etiologic type: type 1 diabetes (REF = type 2 diabetes) | 0.05 (0.08)  | 0.5459   |
| Age (years)                                             | 0.03 (0.01)  | <0.0001  |
| Race/ethnicity: non-Hispanic White                      | 0.17 (0.06)  | 0.0036   |
| Sex: male (REF = female)                                | 0.16 (0.05)  | 0.0021   |
| Time-weighted HbA <sub>1c</sub> (%)                     | 0.06 (0.02)  | 0.0004   |
| Initial Ln(LF:HF ratio)                                 | 0.36 (0.03)  | <0.0001  |

Data are parameter estimates (SE).

PWV and Alx were higher in participants with type 2 diabetes versus type 1 diabetes at initial assessment ( $P < 0.001$ ). This difference persisted at follow-up ( $P < 0.001$ ). Femoral-foot and carotid-radial PWVs were also higher in the participants with type 2 diabetes versus type 1 diabetes at initial assessment and follow-up (Table 2). The change over time was higher for carotid-radial PWV and Alx in those with type 2 diabetes versus type 1 diabetes ( $P < 0.0001$ ) (Table 2).

Figure 1B shows lower overall HRV (SDNN) and parasympathetic loss (lower PNN50) in participants with type 2 diabetes at initial assessment ( $P < 0.0001$ ), with differences persisting at follow-up ( $P < 0.0001$ ). Table 2 shows worse RMSSD at initial and follow-up assessment ( $P < 0.001$ ). The change over time in PNN50 was greater in those with type 2 diabetes versus type 1 diabetes ( $P = 0.0314$ ) and approached significance for SDNN ( $P = 0.10$ ). There was no difference in LF:HF at initial or follow-up assessment by diabetes type and no difference in change over time by diabetes type.

Risk factors associated with the three PWV outcomes at follow-up included initial arterial stiffness value, older age, longer duration of diabetes, BP, and HbA<sub>1c</sub> over time (time-weighted values, all  $P < 0.05$ ) (Table 3). Higher waist circumference over time was also associated with

worse carotid-femoral and femoral-foot PWV outcomes, while increases in triglycerides over time was associated with higher femoral-foot PWV only. Male sex was associated with higher femoral-foot and carotid-radial PWVs, while non-Hispanic White race and ethnicity were associated with lower carotid-radial PWV (all  $P < 0.05$ ). Type 2 diabetes was significantly associated with higher carotid-femoral PWV ( $P = 0.0428$ ), higher carotid-radial PWV ( $P = 0.0348$ ), and higher Alx ( $P = 0.0014$ ). Other factors associated with higher Alx were older age, longer diabetes duration, less physical activity, and higher BP and HbA<sub>1c</sub> over time (all  $P < 0.05$ ).

Lower initial HRV value, longer duration of diabetes, higher triglycerides, BP and HbA<sub>1c</sub> over time, and less physical activity were associated with overall worse HRV (lower SDNN, PNN50, and RMSSD). Female sex was also associated with worse PNN50 and RMSSD. Older age and higher HbA<sub>1c</sub> were also associated with worse LF:HF ratio. Diabetes type was not associated with any of the HRV indices.

In secondary analyses, all arterial stiffness and HRV models were repeated for only the participants with type 1 diabetes. Higher triglycerides, waist circumference, BP, and HbA<sub>1c</sub> were associated with higher arterial stiffness and lower HRV in those with type 1 diabetes (data not shown).

## CONCLUSIONS

This first longitudinal study is the to compare the change over time of arterial stiffness and HRV in young adults with youth-onset type 1 and type 2 diabetes. The major findings of this study are that youth and young adults with type 2 diabetes have worse arterial stiffness and HRV than those with type 1 diabetes at initial and follow-up assessment 4.5 years later, there is a steeper trajectory of worsening arterial stiffness and HRV in those with type 2 diabetes versus type 1 diabetes, and features of the metabolic syndrome appear to worsen arterial stiffness and HRV regardless of type of diabetes.

The majority of data documenting longitudinal changes in subclinical cardiovascular disease come from participants with adult-onset diabetes. However, since youth-onset diabetes differs from adult-onset diabetes, applying conclusions from adult data is problematic (33–35).

Cross-sectional work from the SEARCH study and others have documented that many individuals with youth-onset diabetes have risk factors for or evidence of diabetes complications by young adulthood (1,36). However, when compared by diabetes type, there appears to be excess burden of comorbidities and complications in young adults with type 2 diabetes versus type 1 diabetes, even after

accounting for age, race and ethnicity, sex, and other potential confounders (1,36). The Treatment Options for Type 2 Diabetes in Adolescents and Youth (TODAY) study investigators recently showed that 60% of their cohort of young adults with youth-onset type 2 diabetes had at least one microvascular complication by age 26 years (36). The reasons for higher rates of vascular disease in type 2 diabetes versus type 1 diabetes are not clear but may be due to insulin resistance, inflammation, advanced glycation end products, endothelial dysfunction, or dietary factors, all areas of ongoing study.

Arterial stiffness and abnormalities in HRV are associated with future risk of cardiovascular target organ damage and future cardiovascular events in adults (8–12). We and others have shown in cross-sectional work that arterial stiffness and abnormalities in HRV are present in youth with type 1 diabetes (37) and type 2 diabetes (3,5,14) by their teenage years, with comparison studies showing greater arterial stiffness and lower HRV in type 2 diabetes versus type 1 diabetes (15). Recent work has begun to explore the changes over time in arterial stiffness and HRV. Young adults with youth-onset type 2 diabetes show continued changes over time in arterial stiffness and HRV (38) and accelerated changes in arterial stiffness compared with age-similar healthy peers and those who are obese and do not have diabetes (39).

Until now, a comparison of trajectories of these complications between type 1 and type 2 diabetes has not been conducted, although cross-sectional studies suggest earlier and more severe diabetes-related complications in individuals with type 2 diabetes versus type 1 diabetes (1,39,40). We observed that by young adulthood, despite similar diabetes duration, there is a greater worsening of arterial stiffness and HRV over time, with a steeper trajectory in those with youth-onset type 2 diabetes versus type 1 diabetes. It is important to note that we also observed an increase in arterial stiffness and declines in HRV in participants with type 1 diabetes over time, although these were less severe.

Risk factors over time, including higher waist circumference, BP, and triglycerides and worse glycemic control, were evaluated along with the follow-up arterial stiffness and HRV outcomes to assess their cumulative burden (15–20). Cross-

sectional data have shown a relationship between worse glycemic control and higher BP with worse HRV and higher arterial stiffness (5,41). Now, we show the cumulative effect of not only glycemic control and BP but also triglycerides and waist circumference (time-weighted values), features of the metabolic syndrome. These risk factors were also significant in our sensitivity analyses of young adults with type 1 diabetes. Duration of diabetes was identified as an important risk factor, suggesting that preventing or delaying the onset of diabetes is imperative, and in both forms of diabetes, prevention of obesity and its associated comorbidities (hypertension, dyslipidemia) is critical. Other characteristics associated with follow-up arterial stiffness and HRV include minority race and ethnicity and female sex, suggesting that these groups carry a disproportionate burden of impaired arterial stiffness and HRV and may warrant closer monitoring or early intervention to reduce health disparities. Finally, it is important to note that age was associated with follow-up arterial stiffness and HRV; thus, older age may account for some of the differences in these measures between individuals with type 2 and type 1 diabetes.

No differences in the frequency measures of HRV (LF power, HF power, and LF:HF ratio) were found at baseline or over time by diabetes type, which may be a result of methodology. We postulate that analyses of HRV variability for >10 min is required to detect differences in these frequency domains. Assessment of HRV of 24 h has been used to predict future risk of heart attack (42). In addition, previous work has suggested that frequency measures as opposed to the time domains (SDNN, PNN50, and RMSDD) may be less sensitive to the detection of HRV and may be influenced by respiratory sinus arrhythmia, posture/movement, and other vagal components (32).

This study had several limitations. HRV was limited to a relatively short length of recording (10 min). Although this method is considered standard clinical and research practice by the Task Force of the European Society of Cardiology and the North American Society of Pacing and Electrophysiology, the short measurement period may limit the ability to detect differences between groups and over time compared with time

domains (43). It should also be noted that although we assessed the racial and ethnic differences in arterial stiffness and HRV in our models, our analyses were limited to non-Hispanic White individuals versus others of all races and ethnicities because of sample sizes. Strengths of this study are the longitudinal follow-up of a large cohort of multiethnic youth with both type 1 and type 2 diabetes and the ability to compare the trajectory of arterial stiffness and HRV over time in young adults with type 1 versus type 2 diabetes and to assess the impact of a cumulative burden of risk factors over time.

In summary, this study demonstrates that in adolescents and young adults with youth-onset diabetes, arterial stiffness and HRV were worse among those with type 2 diabetes compared with type 1 diabetes. Furthermore, arterial stiffness over time had a worse trajectory in those with type 2 diabetes. The risk profile for progression of arterial stiffness informs potential interventions to prevent or limit future individual cardiovascular burden and reduce the public health implications.

**Acknowledgments.** The SEARCH study investigators are indebted to the many youth and their families and their health care providers whose participation made this work possible.

**Funding.** SEARCH 4 is funded by National Institutes of Health (NIH), National Institute of Diabetes and Digestive and Kidney Diseases (NIDDK) grants 1R01DK127208-01 and 1UC4DK108173 and supported by the Centers for Disease Control and Prevention (CDC). The Population Based Registry of Diabetes in Youth Study is funded by the CDC (DP-15-002) and supported by the NIH, NIDDK (1U18DP006131, U18DP006133, U18DP006134, U18DP006136, U18DP006138, and U18DP006139). SEARCH 1, 2, and 3 are funded by the CDC (PA nos. 00097, DP-05-069, and DP-10-001) and supported by NIDDK. NIH also funded the Kaiser Permanente Southern California (U48/CCU919219, U01DP000246, and U18DP002714), University of Colorado Denver (U48/CCU819241-3, U01DP000247, and U18DP000247-06A1), Cincinnati Children's Hospital Medical Center (U48/CCU519239, U01DP000248, and U18DP002709), University of North Carolina at Chapel Hill (U48/CCU419249, U01DP000254, and U18DP002708), Seattle Children's Hospital (U58/CCU019235-4, U01DP000244, and U18DP002710-01), and Wake Forest University School of Medicine (U48/CCU919219, U01DP000250, and 200-2010-35171) study sites. The authors acknowledge the involvement of the Kaiser Permanente Southern California's Clinical Research Center (funded by Kaiser Foundation Health Plan and



supported in part by the Southern California Permanente Medical Group), the South Carolina Clinical and Translational Research Institute, at the Medical University of South Carolina (NIH/ National Center for Advancing Translational Sciences [NCATS] grants UL1TR000062 and UL1TR001450), Seattle Children's Hospital and the University of Washington (NIH/ NCATS grant UL1TR00423), University of Colorado Pediatric Clinical and Translational Research Center (NIH/NCATS grant UL1TR000154), the Barbara Davis Center at the University of Colorado at Denver (NIH Diabetes and Endocrinology Research Center grant P30DK57516), the University of Cincinnati (NIH/NCATS grants UL1TR000077 and UL1TR001425), and the Children with Medical Handicaps program managed by the Ohio Department of Health.

This study includes data provided by the Ohio Department of Health, which should not be considered an endorsement of this study or its conclusions. The findings and conclusions in this report are those of the authors and do not necessarily represent the official position of the CDC and NIDDK.

**Duality of Interest.** No potential conflicts of interest relevant to this article were reported.

**Author Contributions.** A.S.S. designed the analysis plan and wrote the manuscript. S.I. conducted the data analysis and edited the manuscript. R.D. helped with the statistical analysis and interpretation of the findings. L.M.D., D.D., G.I., A.M., E.L., C.P., and S.M. designed the study and edited the manuscript. E.M.U. designed the analysis plan, interpreted the results, and edited the manuscript. All authors have given final approval of the version of the manuscript to be published. A.S.S. and S.I. are the guarantors of this work and, as such, had full access to all the data in the study and take responsibility for the integrity of the data and the accuracy of the data analysis.

**Prior Presentation.** Parts of this study were presented in abstract form at the 82nd Scientific Sessions of the American Diabetes Association, New Orleans, LA, 3–7 June 2022.

## References

- Dabelea D, Stafford JM, Mayer-Davis EJ, et al.; SEARCH for Diabetes in Youth Research Group. Association of type 1 diabetes vs type 2 diabetes diagnosed during childhood and adolescence with complications during teenage years and young adulthood. *JAMA* 2017;317:825–835
- Jaiswal M, Divers J, Urbina EM, et al.; SEARCH for Diabetes in Youth Study Group. Cardiovascular autonomic neuropathy in adolescents and young adults with type 1 and type 2 diabetes: The SEARCH for Diabetes in Youth Cohort Study. *Pediatr Diabetes* 2018;19:680–689
- Shah AS, El Ghormli L, Gidding SS, et al. Prevalence of arterial stiffness in adolescents with type 2 diabetes in the TODAY cohort: relationships to glycemic control and other risk factors. *J Diabetes Complications* 2018;32:740–745
- Rodriguez BL, Dabelea D, Liese AD, et al.; SEARCH Study Group. Prevalence and correlates of elevated blood pressure in youth with diabetes mellitus: the SEARCH for diabetes in youth study. *J Pediatr* 2010;157:245–251.e1
- Shah AS, El Ghormli L, Vajravelu ME, et al. Heart rate variability and cardiac autonomic dysfunction: prevalence, risk factors, and relationship to arterial stiffness in the Treatment Options for Type 2 Diabetes in Adolescents and Youth (TODAY) study. *Diabetes Care* 2019;42:2143–2150
- Vlachopoulos C, Aznaouridis K, Stefanadis C. Prediction of cardiovascular events and all-cause mortality with arterial stiffness: a systematic review and meta-analysis. *J Am Coll Cardiol* 2010;55:1318–1327
- Urbina EM, Williams RV, Alpert BS, et al.; American Heart Association Atherosclerosis, Hypertension, and Obesity in Youth Committee of the Council on Cardiovascular Disease in the Young. Noninvasive assessment of subclinical atherosclerosis in children and adolescents: recommendations for standard assessment for clinical research: a scientific statement from the American Heart Association. *Hypertension* 2009;54:919–950
- Vinik AI, Maser RE, Mitchell BD, Freeman R. Diabetic autonomic neuropathy. *Diabetes Care* 2003;26:1553–1579
- Maser RE, Mitchell BD, Vinik AI, Freeman R. The association between cardiovascular autonomic neuropathy and mortality in individuals with diabetes: a meta-analysis. *Diabetes Care* 2003;26:1895–1901
- Pop-Busui R, Boulton AJ, Feldman EL, et al. Diabetic neuropathy: a position statement by the American Diabetes Association. *Diabetes Care* 2017;40:136–154
- Benichou T, Pereira B, Mermillod M, et al. Heart rate variability in type 2 diabetes mellitus: a systematic review and meta-analysis. *PLoS One* 2018;13:e0195166
- Cha SA, Park YM, Yun JS, et al. Time- and frequency-domain measures of heart rate variability predict cardiovascular outcome in patients with type 2 diabetes. *Diabetes Res Clin Pract* 2018;143:159–169
- Jaiswal M, Urbina EM, Wadwa RP, et al. Reduced heart rate variability is associated with increased arterial stiffness in youth with type 1 diabetes: the SEARCH CVD study. *Diabetes Care* 2013;36:2351–2358
- Shah AS, Jaiswal M, Dabelea D, et al. Cardiovascular risk and heart rate variability in young adults with type 2 diabetes and arterial stiffness: the SEARCH for Diabetes in Youth study. *J Diabetes Complications* 2020;34:107676
- Wadwa RP, Urbina EM, Anderson AM, et al.; SEARCH Study Group. Measures of arterial stiffness in youth with type 1 and type 2 diabetes: the SEARCH for diabetes in youth study. *Diabetes Care* 2010;33:881–886
- Urbina EM, Isom S, Bell RA, et al.; SEARCH for Diabetes in Youth Study Group. Burden of cardiovascular risk factors over time and arterial stiffness in youth with type 1 diabetes mellitus: the SEARCH for Diabetes in Youth study. *J Am Heart Assoc* 2019;8:e010150
- Shah AS, Wadwa RP, Dabelea D, et al. Arterial stiffness in adolescents and young adults with and without type 1 diabetes: the SEARCH CVD study. *Pediatr Diabetes* 2015;16:367–374
- Shah AS, Dabelea D, Talton JW, et al. Smoking and arterial stiffness in youth with type 1 diabetes: the SEARCH Cardiovascular Disease study. *J Pediatr* 2014;165:110–116
- Shah AS, Black S, Wadwa RP, et al. Insulin sensitivity and arterial stiffness in youth with type 1 diabetes: the SEARCH CVD study. *J Diabetes Complications* 2015;29:512–516
- Dabelea D, Talton JW, D'Agostino R Jr, et al. Cardiovascular risk factors are associated with increased arterial stiffness in youth with type 1 diabetes: the SEARCH CVD study. *Diabetes Care* 2013;36:3938–3943
- Dabelea D, Pihoker C, Talton JW, et al.; SEARCH for Diabetes in Youth Study. Etiological approach to characterization of diabetes type: the SEARCH for Diabetes in Youth study. *Diabetes Care* 2011;34:1628–1633
- Dabelea D, D'Agostino RB Jr, Mason CC, et al. Development, validation and use of an insulin sensitivity score in youths with diabetes: the SEARCH for Diabetes in Youth study. *Diabetologia* 2011;54:78–86
- Crume TL, Hamman RF, Isom S, et al.; SEARCH for Diabetes in Youth Study Group. The accuracy of provider diagnosed diabetes type in youth compared to an etiologic criteria in the SEARCH for Diabetes in Youth study. *Pediatr Diabetes* 2020;21:1403–1411
- Shah AS, Maahs DM, Stafford JM, et al. Predictors of dyslipidemia over time in youth with type 1 diabetes: for the SEARCH for Diabetes in Youth study. *Diabetes Care* 2017;40:607–613
- Flynn JT, Kaelber DC, Baker-Smith CM, et al.; Subcommittee on Screening and Management of High Blood Pressure in Children. Clinical practice guideline for screening and management of high blood pressure in children and adolescents. *Pediatrics* 2017;140:e20171904
- Urbina EM, Khoury PR, McCoy C, Daniels SR, Kimball TR, Dolan LM. Cardiac and vascular consequences of pre-hypertension in youth. *J Clin Hypertens (Greenwich)* 2011;13:332–342
- Laurent S, Cockcroft J, Van Bortel L, et al.; European Network for Non-invasive Investigation of Large Arteries. Expert consensus document on arterial stiffness: methodological issues and clinical applications. *Eur Heart J* 2006;27:2588–2605
- O'Rourke MF, Gallagher DE. Pulse wave analysis. *J Hypertens Suppl* 1996;14:S147–S157
- Vlachopoulos C, Aznaouridis K, O'Rourke MF, Safar ME, Baou G, Stefanadis C. Prediction of cardiovascular events and all-cause mortality with central haemodynamics: a systematic review and meta-analysis. *Eur Heart J* 2010;31:1865–1871
- Vinik AI, Ziegler D. Diabetic cardiovascular autonomic neuropathy. *Circulation* 2007;115:387–397
- Fagard RH, Pardaens K, Staessen JA, Thijs L. Power spectral analysis of heart rate variability by autoregressive modelling and fast Fourier transform: a comparative study. *Acta Cardiol* 1998;53:211–218
- Hayano J, Yuda E. Pitfalls of assessment of autonomic function by heart rate variability. *J Physiol Anthropol* 2019;38:3
- Uttschneider KM, Tripputi MT, Kozedub A, et al.; RISE Consortium.  $\beta$ -Cells in youth with impaired glucose tolerance or early type 2 diabetes secrete more insulin and are more responsive than in adults. *Pediatr Diabetes* 2020;21:1421–1429
- Uttschneider KM, Tripputi MT, Kozedub A, et al.; RISE Consortium. Differential loss of  $\beta$ -cell

- function in youth vs. adults following treatment withdrawal in the Restoring Insulin Secretion (RISE) study. *Diabetes Res Clin Pract* 2021;178:108948
35. RISE Consortium; RISE Consortium Investigators. Effects of treatment of impaired glucose tolerance or recently diagnosed type 2 diabetes with metformin alone or in combination with insulin glargine on  $\beta$ -cell function: comparison of responses in youth and adults. *Diabetes* 2019;68:1670–1680
36. Bjornstad P, Drews KL, Caprio S, et al.; TODAY Study Group. Long-term complications in youth-onset type 2 diabetes. *N Engl J Med* 2021;385:416–426
37. Jaiswal M, Urbina EM, Wadwa RP, et al. Reduced heart rate variability among youth with type 1 diabetes: the SEARCH CVD study. *Diabetes Care* 2013;36:157–162
38. Shah AS, El Ghormli L, Gidding SS, et al. Longitudinal changes in vascular stiffness and heart rate variability among young adults with youth-onset type 2 diabetes: results from the follow-up observational Treatment Options for Type 2 Diabetes in Adolescents and Youth (TODAY) study. *Acta Diabetol* 2022;59:197–205
39. Ryder JR, Northrop E, Rudser KD, et al. Accelerated early vascular aging among adolescents with obesity and/or type 2 diabetes mellitus. *J Am Heart Assoc* 2020;9:e014891
40. Dart AB, Martens PJ, Rigatto C, Brownell MD, Dean HJ, Sellers EA. Earlier onset of complications in youth with type 2 diabetes. *Diabetes Care* 2014;37:436–443
41. Jaiswal M, Fingerlin TE, Urbina EM, et al. Impact of glycemic control on heart rate variability in youth with type 1 diabetes: the SEARCH CVD study. *Diabetes Technol Ther* 2013;15:977–983
42. Shaffer F, McCraty R, Zerr CL. A healthy heart is not a metronome: an integrative review of the heart's anatomy and heart rate variability. *Front Psychol* 2014;5:1040
43. Task Force of the European Society of Cardiology and the North American Society of Pacing and Electrophysiology. Heart rate variability: standards of measurement, physiological interpretation and clinical use. *Circulation* 1996;93:1043–1065
